# Supplementary material for: Assessing the health outcomes associated with solid waste management practices in Urban Bengaluru: A cross-sectional study
Source: Research Square preprint supplement (doi:10.21203/rs.3.rs-7182779/v1), 2025-09-01
Supplement: Supplementary file 1 [file 1c4058d1ad2fd8386ed34850.docx]

**Data Collection Form**

I. Socio-Demographic Information

1. Name: ______________________________
2. Age: _______
3. Gender:
   ☐ Male (1)
   ☐ Female (2)
   ☐ Other (3)
4. Highest Education Received:
   ☐ None at all (1)
   ☐ Primary school (2)
   ☐ Secondary school (3)
   ☐ Undergraduate (4)
   ☐ Postgraduate (5)
5. Marital Status:
   ☐ Single (1)
   ☐ Married (2)
   ☐ Separated (3)
   ☐ Divorced (4)
   ☐ Widowed (5)
6. Occupation:
   ☐ Unemployed (1)
   ☐ Student (2)
   ☐ Homemaker (3)
   ☐ Daily wage worker (4)
   ☐ Self-employed (5)
   ☐ Private sector employee (6)
   ☐ Government employee (7)
   ☐ Retired (8)
   ☐ Other (9) Specify: ___________
7. Household Income:
   ☐ ₹0 (1)
   ☐ < ₹10,000 (2)
   ☐ ₹10,000 – ₹25,000 (3)
   ☐ ₹25,000 – ₹50,000 (4)
   ☐ ₹50,000 – ₹1,00,000 (5)
   ☐ > ₹1,00,000 (6)
8. Residential Area: ______________________________
9. Are you currently experiencing any health issues?
   ☐ Yes (1)
   ☐ No (2)
10. If yes, please specify the health issue(s): ________________

**II. General Quality of Life and Health**

1. How would you rate your quality of life?
   ☐ Very poor (1)
   ☐ Poor (2)
   ☐ Neither poor nor good (3)
   ☐ Good (4)
   ☐ Very good (5)
2. How satisfied are you with your health?
   ☐ Very dissatisfied (1)
   ☐ Dissatisfied (2)
   ☐ Neither satisfied nor dissatisfied (3)
   ☐ Satisfied (4)
   ☐ Very satisfied (5)
3. To what extent do you feel that (physical) pain prevents you from doing what you need to do?
   ☐ Not at all (1)
   ☐ A little (2)
   ☐ A moderate amount (3)
   ☐ Very much (4)
   ☐ An extreme amount (5)
4. How much do you need any medical treatment to function in your daily life?
   ☐ Not at all (1)
   ☐ A little (2)
   ☐ A moderate amount (3)
   ☐ Very much (4)
   ☐ An extreme amount (5)

**III. Psychological and Physical Well-being**

1. How much do you enjoy life?
   ☐ Not at all (1)
   ☐ A little (2)
   ☐ A moderate amount (3)
   ☐ Very much (4)
   ☐ Extremely (5)
2. How well are you able to concentrate?
   ☐ Not at all (1)
   ☐ A little (2)
   ☐ A moderate amount (3)
   ☐ Very much (4)
   ☐ Extremely (5)
3. How safe do you feel in your daily life?
   ☐ Not at all (1)
   ☐ A little (2)
   ☐ A moderate amount (3)
   ☐ Very much (4)
   ☐ Extremely (5)
4. How healthy is your physical environment?
   ☐ Not at all (1)
   ☐ A little (2)
   ☐ A moderate amount (3)
   ☐ Very much (4)
   ☐ Extremely (5)

**IV. Energy, Resources, and Daily Activities**

1. Do you have enough energy for everyday life?
   ☐ Not at all (1)
   ☐ A little (2)
   ☐ A moderate amount (3)
   ☐ Mostly (4)
   ☐ Completely (5)
2. Have you enough money to meet your needs?
   ☐ Not at all (1)
   ☐ A little (2)
   ☐ A moderate amount (3)
   ☐ Mostly (4)
   ☐ Completely (5)
3. To what extent do you have the opportunity for leisure activities?
   ☐ Not at all (1)
   ☐ A little (2)
   ☐ A moderate amount (3)
   ☐ Mostly (4)
   ☐ Completely (5)
4. How well are you able to get around?
   ☐ Very poor (1)
   ☐ Poor (2)
   ☐ Neither poor nor good (3)
   ☐ Good (4)
   ☐ Very good (5)

**V. Satisfaction with Life and Environment**

1. How satisfied are you with your sleep?
   ☐ Very dissatisfied (1)
   ☐ Dissatisfied (2)
   ☐ Neither satisfied nor dissatisfied (3)
   ☐ Satisfied (4)
   ☐ Very satisfied (5)
2. How satisfied are you with your ability to perform your daily living activities?
   ☐ Very dissatisfied (1)
   ☐ Dissatisfied (2)
   ☐ Neither satisfied nor dissatisfied (3)
   ☐ Satisfied (4)
   ☐ Very satisfied (5)
3. How satisfied are you with your capacity for work?
   ☐ Very dissatisfied (1)
   ☐ Dissatisfied (2)
   ☐ Neither satisfied nor dissatisfied (3)
   ☐ Satisfied (4)
   ☐ Very satisfied (5)
4. How satisfied are you with the support you get from your friends?
   ☐ Very dissatisfied (1)
   ☐ Dissatisfied (2)
   ☐ Neither satisfied nor dissatisfied (3)
   ☐ Satisfied (4)
   ☐ Very satisfied (5)
5. How satisfied are you with the conditions of your living place?
   ☐ Very dissatisfied (1)
   ☐ Dissatisfied (2)
   ☐ Neither satisfied nor dissatisfied (3)
   ☐ Satisfied (4)
   ☐ Very satisfied (5)
6. How satisfied are you with your access to health services?
   ☐ Very dissatisfied (1)
   ☐ Dissatisfied (2)
   ☐ Neither satisfied nor dissatisfied (3)
   ☐ Satisfied (4)
   ☐ Very satisfied (5)
7. How satisfied are you with your transport?
   ☐ Very dissatisfied (1)
   ☐ Dissatisfied (2)
   ☐ Neither satisfied nor dissatisfied (3)
   ☐ Satisfied (4)
   ☐ Very satisfied (5)
8. How often do you have negative feelings such as blue mood, despair, anxiety, or depression?
   ☐ Never (1)
   ☐ Seldom (2)
   ☐ Quite often (3)
   ☐ Very often (4)
   ☐ Always (5)

**VI. Solid Waste Management and Environmental Health**

1. How satisfied are you with the cleanliness of your neighbourhood, including waste disposal practices?
   ☐ Very dissatisfied (1)
   ☐ Dissatisfied (2)
   ☐ Neutral (3)
   ☐ Satisfied (4)
   ☐ Very satisfied (5)
2. How satisfied are you with access to clean water and sanitation facilities in your area?
   ☐ Very dissatisfied (1)
   ☐ Dissatisfied (2)
   ☐ Neutral (3)
   ☐ Satisfied (4)
   ☐ Very satisfied (5)
3. How healthy do you think your living environment is in terms of waste management and pollution?
   ☐ Very unhealthy (1)
   ☐ Unhealthy (2)
   ☐ Neutral (3)
   ☐ Healthy (4)
   ☐ Very healthy (5)
4. How often do you notice uncollected waste or overflowing bins in your area?
   ☐ Never (1)
   ☐ Rarely (2)
   ☐ Sometimes (3)
   ☐ Frequently (4)
   ☐ Always (5)
5. Are you aware of the health risks associated with improper waste disposal in your community?
   ☐ Yes (1)
   ☐ No (2)

35a. If yes, which health risks are you aware of? (Select all that apply)
 ☐ Respiratory issues (e.g., asthma, lung infections) (1)
 ☐ Skin infections and allergies (2)
 ☐ Waterborne diseases (e.g., cholera, typhoid) (3)
 ☐ Vector-borne diseases (e.g., dengue, malaria) (4)
 ☐ Food contamination and poisoning (5)
 ☐ Other (6) Specify: ___________

1. How often do you or your household segregate waste for recycling?
   ☐ Never (1)
   ☐ Sometimes (2)
   ☐ Often (3)
   ☐ Always (4)
2. If never, what is the main reason?
   ☐ Lack of awareness (1)
   ☐ Lack of facilities (2)
   ☐ No habit of segregation (3)
   ☐ Other (4) Specify: ___________
3. Do you think poor waste management practices in your area are contributing to environmental pollution?
   ☐ Not at all (1)
   ☐ A little (2)
   ☐ Moderately (3)
   ☐ A lot (4)
4. How concerned are you about vector-borne diseases (e.g., malaria, dengue) related to waste in your surroundings?
   ☐ Not at all concerned (1)
   ☐ Slightly concerned (2)
   ☐ Moderately concerned (3)
   ☐ Very concerned (4)
   ☐ Extremely concerned (5)
5. Do you feel that the waste management practices in your area are affecting your health?
   ☐ Not at all (1)
   ☐ A little (2)
   ☐ A moderate amount (3)
   ☐ Very much (4)
   ☐ Extremely (5)
6. How satisfied are you with the waste management services (e.g., waste collection, disposal) provided in your area?
   ☐ Very dissatisfied (1)
   ☐ Dissatisfied (2)
   ☐ Neither satisfied nor dissatisfied (3)
   ☐ Satisfied (4)
   ☐ Very satisfied (5)

**STROBE Checklist for Cross-sectional Studies**

|  | **Item No.** | **Recommendation** | **Page No.** | **Relevant text from manuscript** |
| --- | --- | --- | --- | --- |
| **Title and abstract** | 1(a) | Indicate the study’s design with a commonly used term in the title or the abstract | Title page, Abstract (page no. 1) | Title: “Assessing the Health outcomes associated with solid waste management Practices in Urban Bengaluru: A Cross-Sectional Study”; Abstract: “A cross-sectional study was conducted among 420 adults...” |
| 1(b) | Provide in the abstract an informative and balanced summary of what was done and what was found | Abstract (page no. 1) | The abstract summarizes background, cross-sectional design, stratified sampling, WHOQOL-BREF, statistical analysis, and results showing strong association between SWM practices and QoL. |
| **Introduction** | 2 | Explain the scientific background and rationale for the investigation being reported | Pages 2–3 | Discusses rapid urbanization in Bengaluru, poor SWM services, environmental and health hazards, and literature gaps in urban India. Rationale grounded in SDG goals and public health importance. |
| 3 | State specific objectives, including any prespecified hypotheses | Page 2-3 | Primary Objective: To assess the association between different SWM practices and QoL using validated tools. Secondary Objective: To evaluate public awareness and perceptions of SWM impact on QoL. |
| **Methods** | 4 | Present key elements of study design early in the paper | Page 4-5 | A community-based cross-sectional study design was used to assess the association between SWM practices and QoL. |
| 5 | Describe the setting, locations, and relevant dates | Page 4-5 | Study was conducted in Bengaluru across eight BBMP zones from February to April 2025, covering a range of development and waste infrastructure. |
| 6(a) | Cross-sectional study—Give eligibility criteria, sources, and selection methods | Pages 4-5 | Adults ≥18 years, living in Bengaluru ≥1 year. Stratified random sampling by development level and ward. |
| 7 | Clearly define outcomes, exposures, predictors, confounders | Page 4-5 | Outcome: QoL (WHOQOL-BREF domains). Exposures: SWM practices (segregation, satisfaction, etc.). Confounders: age, education, income, residence zone. |
| 8* | Data sources and methods of assessment | Pages 4-5 | WHOQOL-BREF for QoL. Interviewer-administered structured questionnaire for SWM awareness, practices, and satisfaction. Bilingual (English & Kannada). |
| 9 | Describe any efforts to address bias | Page 4-5 | Used stratified random sampling, standardized tools (WHOQOL-BREF), forward-backward translation, and trained interviewers. |
| 10 | Explain how study size was arrived at | Page 4-5 | Total of 420 participants selected proportionally from stratified zones. Sample ensured urban representativeness. |
| 11 | Explain how quantitative variables were handled in the analyses | Pages 4-5 | WHOQOL-BREF domain scores analysed as continuous variables. Socio-demographics categorized (e.g., income, education). |
| 12(a) | Describe all statistical methods, including those used to control for confounding | Page 4-5 | Chi-square, Spearman correlation, ANOVA, multiple linear regression, and logistic regression in R.. |
| 12(b) | Describe any methods used to examine subgroups and interactions | Pages 4-5 | Subgroup analysis by zone, gender, and income done in multivariate and logistic regression models. |
| 12(c) | Explain how missing data were addressed | Page 4-5 | Missing data handled using imputation and exclusion. |
| 12(d) | Analytical methods considering sampling strategy | Page 4-5 | Stratified sampling incorporated; regression models adjusted for sociodemographic strata. |
| 12(e) | Describe any sensitivity analyses | Page 4-5 | Not Conducted |
| **Results** | 13(a) | Report numbers of individuals at each stage | Page 6-14 | 420 participants selected and surveyed through stratified random sampling; all completed data collection. |
| 13(b) | Give reasons for non-participation at each stage | Not reported | No non-response or exclusion reported; full participation. |
| 13(c) | Consider use of a flow diagram | Appendix Figure I | Participant selection flow diagram provided |
| 14(a) | Give characteristics of study participants | Pages 6-14 | Table of demographic characteristics includes age, gender, education, occupation, income, and residential zone. |
| 14(b) | Indicate number of participants with missing data | Page 6-14 | Missing data minimized by design; addressed through checks, imputation, and exclusion of critical gaps. |
| 15* | Cross-sectional study—Report numbers of outcome events or summary measures | Pages 6-14 | QoL domain scores reported with Spearman correlation, linear and logistic regression. |
| 16(a) | Main results: unadjusted and adjusted estimates | Pages 6-14 | Regression tables include beta coefficients, odds ratios, p-values, and 95% confidence intervals. |
| 16(b) | Report category boundaries when continuous variables were categorized | Pages 6-14 | Categorical groupings provided for income, education, and SWM behaviours. |
| 17 | Report other analyses (e.g., subgroups, interactions) | Pages 6-14 | Subgroup analysis reported by income, zone, and gender. |
| **Discussion** | 18 | Summarise key results with reference to study objectives | Page 15-16 | SWM practices like segregation and cleanliness satisfaction are significantly associated with QoL; independent predictors identified. |
| 19 | Discuss limitations of the study | Page 15-16 | Cross-sectional design limits causality; reliance on self-report data; no validation of composite scores for awareness. |
| 20 | Give overall interpretation considering limitations and other evidence | Pages 15-16 | Results align with previous literature; supports integration of SWM and public health; highlights intra-urban inequities. |
| 21 | Discuss the generalisability of the study | Page 15-16 | Results are generalizable to urban Bengaluru. |
| **Other information** | 22 | Funding source and role of funders | Page 16 | No external funding was received for this study. |
